# Supplementary material for: Calcium carbonates: Induced biomineralization vs. controlled macromorphology?
Source: Copernicus journal article supplement (doi:10.5194/bg-2017-251), 2017-06-27
Supplement: Supplementary file [file bg-2017-251-AC6-supplement.pdf]

## Supplemental Material

**Tab. S1:** Strains selected from each habitat used in this study. The four most representative strains from isolation plates for rock (r), groundwater (gw) and soil (s) samples from Middle Muschelkalk (MM) or Lower (LM) were selected. 16S rDNA sequence accession numbers are given in parentheses (Genbank).

| rLM                                            | rMM                                                        | gwLM                                                 | gwMM                                                  | sLM                                            | sMM                                                   |
|------------------------------------------------|------------------------------------------------------------|------------------------------------------------------|-------------------------------------------------------|------------------------------------------------|-------------------------------------------------------|
| <i>Bacillus</i> sp. rLMa<br>(KX527723.1)       | <i>Arthrobacter pascens</i><br>rMM19                       | <i>Flavobacterium limicola</i> S_5.3<br>(KR088468.1) | <i>Arthrobacter</i> sp.<br>W_2.1 (KX570903.1)         | <i>Agromyces cerinus</i><br>sLM10 (KX536506.1) | <i>Agrococcus jejuensis</i><br>sMM51 (KX527688.1)     |
| <i>Bacillus muralis</i> rLMd<br>(KX527725.1)   | <i>Bacillus</i> sp. rMM8<br>(KX527696.1)                   | <i>Lelliottia amni-gena</i><br>S_H3 (KR088478.1)     | <i>Planococcus</i> sp.<br>W_1.2 (KR088481.1)          | <i>Bacillus</i> sp. sLM42<br>(KX536514.1)      | <i>Moraxella osloensis</i><br>sMM16 (KX527667.1)      |
| <i>Bacillus simplex</i> 3.3F<br>(KX527719.1)   | <i>Psychrobacillus psychrodurans</i> rMM20<br>(KX527705.1) | <i>Pseudomonas</i> sp.<br>S_H4 (KX573101.1)          | <i>Rhodococcus erythropolis</i> W_Sd5<br>(KX570908.1) | <i>Streptomyces</i> sp.<br>sLM17               | <i>Sphingopyxis bauzanensis</i> sMM41<br>(KX527680.1) |
| <i>Micrococcus luteus</i> rLMc<br>(KX527724.1) | <i>Ochrobactrum intermedium</i> rMM23<br>(KX527707.1)      | <i>Rhizobium</i> sp. S_4.1a                          | <i>Advenella</i> sp. W_Sd3<br>(KR088492.1)            | <i>Streptomyces</i> sp. sLM8<br>(KX536505.1)   | <i>Streptomyces</i> sp.<br>sMM10 (KX527665.1)         |

**Tab. S2:** Strains isolated from rock (r), groundwater (gw) and soil (s) samples from Middle Muschelkalk (MM) or Lower (LM) identified by 16S rDNA sequencing. The affiliations to kingdoms (classes for Proteobacteria) are given.

| Strain                                                                 | Organism                          | Affiliation    | Strain                                                   | Organism                            | Affiliation          | Strain                                                                                  | Organism                             | Affiliation         |
|------------------------------------------------------------------------|-----------------------------------|----------------|----------------------------------------------------------|-------------------------------------|----------------------|-----------------------------------------------------------------------------------------|--------------------------------------|---------------------|
| Rock Lower Muschelkalk, outcrop Jena Formation (51125583, 11707340/57) |                                   |                | Groundwater Lower Muschelkalk, Stöben (5660183, 4478864) |                                     |                      | Soil Lower Muschelkalk, quarry Bad Kösen on Jena formation (51125376/427, 11709132/319) |                                      |                     |
| rLM1.4                                                                 | <i>Bacillus niacini</i>           | Firmicutes     | S_1.1                                                    | <i>Pseudomonas</i> sp.              | Gamma-proteobacteria | sLM2                                                                                    | <i>Streptomyces</i> sp.              | Actinobacteria      |
| rLM1.5                                                                 | <i>Bacillus flexus</i>            | Firmicutes     | S_1.13                                                   | <i>Microbacterium</i> sp.           | Actinobacteria       | sLM5                                                                                    | <i>Streptomyces</i> sp.              | Actinobacteria      |
| rLM1.6                                                                 | <i>Bacillus pumilus</i>           | Firmicutes     | S_1.16                                                   | <i>Pantoea ananatis</i>             | Gamma-proteobacteria | sLM6                                                                                    | <i>Rhodococcus</i> sp.               | Actinobacteria      |
| rLM1.9                                                                 | <i>Bacillus altitudinis</i>       | Firmicutes     | S_1.18                                                   | <i>Paenibacillus glycanilyticus</i> | Firmicutes           | sLM8                                                                                    | <i>Streptomyces</i> sp.              | Actinobacteria      |
| rLM2.3                                                                 | <i>Bacillus anthracis</i>         | Firmicutes     | S_2.5                                                    | <i>Pseudomonas migulae</i>          | Gamma-proteobacteria | sLM10                                                                                   | <i>Agromyces cerinus</i>             | Actinobacteria      |
| rLM2.4                                                                 | <i>Bacillus subtilis</i>          | Firmicutes     | S_2.6                                                    | <i>Pseudomonas fluorescens</i>      | Gamma-proteobacteria | sLM11                                                                                   | <i>Bacillus badius</i>               | Firmicutes          |
| rLM2.6                                                                 | <i>Bacillus massiliensis</i>      | Firmicutes     | S_2.9                                                    | <i>Pseudomonas</i> sp.              | Gamma-proteobacteria | sLM13                                                                                   | <i>Bacillus simplex</i>              | Firmicutes          |
| rLM2.7                                                                 | <i>Bacillus strato-sphericus</i>  | Firmicutes     | S_2.10                                                   | <i>Microbacterium</i> sp.           | Actinobacteria       | sLM15                                                                                   | <i>Bacillus pumilus</i>              | Firmicutes          |
| rLM4.3                                                                 | <i>Kocuria</i> sp.                |                | S_3.1                                                    | <i>Aeromonas sharmana</i>           | Gamma-proteobacteria | sLM17                                                                                   | <i>Streptomyces</i> sp.              | Actinobacteria      |
| rLM3.1F                                                                | <i>Bacillus pumilus</i>           | Firmicutes     | S_3.6                                                    | <i>Aeromonas salmonicida</i>        | Gamma-proteobacteria | sLM18                                                                                   | <i>Phyllobacterium</i> sp.           | Alphaproteobacteria |
| rLM3.2F                                                                | <i>Paenibacillus</i> sp.          | Firmicutes     | S_3.7                                                    | <i>Pseudomonas protegens</i>        | Gamma-proteobacteria | sLM29                                                                                   | <i>Paenibacillus</i> sp.             | Firmicutes          |
| rLM3.3F                                                                | <i>Bacillus simplex</i>           | Firmicutes     | S_3.8                                                    | <i>Acinetobacter calcoaceticus</i>  | Gamma-proteobacteria | sLM39                                                                                   | <i>Streptomyces</i> sp.              | Actinobacteria      |
| rLM3.5F                                                                | <i>Bacillus</i> sp.               | Firmicutes     | S_4.1a                                                   | <i>Rhizobium</i> sp.                | Alphaproteobacteria  | sLM41                                                                                   | <i>Streptomyces phaeochromogenes</i> | Actinobacteria      |
| rLM3.6F                                                                | <i>Paenibacillus amylolyticus</i> | Firmicutes     | S_5.2                                                    | <i>Janthinobacterium lividum</i>    | Actinobacteria       | sLM42                                                                                   | <i>Bacillus</i> sp.                  | Firmicutes          |
| rLM4.1F                                                                | <i>Bacillus cereus</i>            | Firmicutes     | S_5.3                                                    | <i>Flavobacterium limicola</i>      | Bacteroidetes        | sLM43                                                                                   | <i>Bacillus</i> sp.                  | Firmicutes          |
| rLMa                                                                   | <i>Bacillus</i> sp.               | Firmicutes     | S_Sd4                                                    | <i>Massilia aurea</i>               | Betaproteobacteria   | sLM47                                                                                   | <i>Bacillus pumilus</i>              | Firmicutes          |
| rLMc                                                                   | <i>Micrococcus luteus</i>         | Actinobacteria | S_Sd8                                                    | <i>Acidovorax facilis</i>           | Betaproteobacteria   | sLM48                                                                                   | <i>Streptomyces anulatus</i>         | Actinobacteria      |
| rLMd                                                                   | <i>Bacillus muralis</i>           | Firmicutes     | S_Sd9                                                    | <i>Pseudomonas peli</i>             | Gamma-proteobacteria | sLM50                                                                                   | <i>Bacillus pumilus</i>              | Firmicutes          |
|                                                                        |                                   |                | S_Sd13                                                   | <i>Aeromonas</i> sp.                | Gamma-proteobacteria | sLM1E4                                                                                  | <i>Caballeronia glathei</i>          | Firmicutes          |
|                                                                        |                                   |                | S_Sd16                                                   | <i>Pseudomonas</i> sp.              | Gamma-proteobacteria | sLM2A3                                                                                  | <i>Pseudomonas brenneri</i>          | Gammaproteobacteria |
|                                                                        |                                   |                | Sd20                                                     | <i>Microbacterium</i> sp.           | Actinobacteria       |                                                                                         |                                      |                     |
|                                                                        |                                   |                | S_A2                                                     | <i>Pseudomonas</i>                  | Gamma-               |                                                                                         |                                      |                     |

|                                                                                    |                                       |                     |                                                            |                                               |                                            |                                                                                                  |                                       |                     |
|------------------------------------------------------------------------------------|---------------------------------------|---------------------|------------------------------------------------------------|-----------------------------------------------|--------------------------------------------|--------------------------------------------------------------------------------------------------|---------------------------------------|---------------------|
|                                                                                    |                                       |                     | S_B2                                                       | <i>baetica</i><br><i>Agrobacterium</i><br>sp. | proteobacteria<br>Alphaproteo-<br>bacteria |                                                                                                  |                                       |                     |
|                                                                                    |                                       |                     | S_G4                                                       | <i>Pseudomonas</i><br><i>umsongensis</i>      | Gamma-<br>proteobacteria                   |                                                                                                  |                                       |                     |
|                                                                                    |                                       |                     | S_H1                                                       | <i>Rahnella</i> sp.                           | Gamma-<br>proteobacteria                   |                                                                                                  |                                       |                     |
|                                                                                    |                                       |                     | S_H3                                                       | <i>Lelliottia</i><br><i>amnigena</i>          | Gamma-<br>proteobacteria                   |                                                                                                  |                                       |                     |
|                                                                                    |                                       |                     | S_H4                                                       | <i>Pseudomonas</i><br>sp.                     | Gamma-<br>proteobacteria                   |                                                                                                  |                                       |                     |
| Rock Middle Muschelkalk, outcrop Kartstadt formation (51126206, 11704266-11704280) |                                       |                     | Groundwater Middle Muschelkalk, Wichmar (5655906, 4478030) |                                               |                                            | Soil Middel Muschelkalk, quarry Bad Kösen, Kartstadt formation (5665596-5665733_4479366-4479449) |                                       |                     |
| rMM4                                                                               | <i>Arthrobacter phenantrenivorans</i> | Actinobacteria      | W_1.1                                                      | <i>Staphylococcus succinus</i>                | Firmicutes                                 | sMM5                                                                                             | <i>Bacillus</i> sp.                   | Firmicutes          |
| rMM7                                                                               | <i>Ramlibacter tataouinensis</i>      | Betaproteobacteria  | W_1.3                                                      | <i>Staphylococcus xylosus</i>                 | Firmicutes                                 | sMM6                                                                                             | <i>Kocuria rhizophila</i>             | Actinobacteria      |
| rMM8                                                                               | <i>Bacillus</i> sp.                   | Firmicutes          | W_2.1                                                      | <i>Arthrobacter</i> sp.                       | Actinobacteria                             | sMM7                                                                                             | <i>Rathayibacter caricis</i>          | Actinobacteria      |
| rMM9                                                                               | <i>Bacillus</i> sp.                   | Firmicutes          | W_3.1b                                                     | <i>Sporosarcina aquimarina</i>                | Firmicutes                                 | sMM10                                                                                            | <i>Streptomyces</i> sp.               | Actinobacteria      |
| rMM10                                                                              | <i>Bacillus</i> sp.                   | Firmicutes          | W_3.2                                                      | <i>Glucamicibacter arilaitensis</i>           | Actinobacteria                             | sMM13                                                                                            | <i>Paracoccus yeei</i>                | Alphaproteobacteria |
| rMM11                                                                              | <i>Streptomyces</i> sp.               | Actinobacteria      | W_3.7                                                      | <i>Pantoea</i> sp.                            | Gamma-<br>proteobacteria                   | sMM16                                                                                            | <i>Moraxella osloensis</i>            | Gammaproteobacteria |
| rMM12                                                                              | <i>Arthrobacter</i> sp.               | Actinobacteria      | W_4.1a                                                     | <i>Pseudomonas</i> sp.                        | Gamma-<br>proteobacteria                   | sMM17                                                                                            | <i>Promicromonospora umidemergens</i> | Actinobacteria      |
| rMM13                                                                              | <i>Arthrobacter phenantrenivorans</i> | Actinobacteria      | W_4.1b                                                     | <i>Lelliottia amnigena</i>                    | Gamma-<br>proteobacteria                   | sMM19                                                                                            | <i>Streptomyces beijiagensis</i>      | Actinobacteria      |
| rMM14                                                                              | <i>Bacillus</i> sp.                   | Firmicutes          | W_5.1a                                                     | <i>Stenotrophomonas rhizophila</i>            | Gamma-<br>proteobacteria                   | sMM21                                                                                            | <i>Dermacoccus</i> sp.                | Actinobacteria      |
| rMM16                                                                              | <i>Bacillus niabensis</i>             | Firmicutes          | W_5.3a                                                     | <i>Shingobacterium kitahiroshimense</i>       | Bacteroidetes                              | sMM23                                                                                            | <i>Arthrobacter pascens</i>           | Actinobacteria      |
| rMM17                                                                              | <i>Arthrobacter phenantrenivorans</i> | Actinobacteria      | W_5.3b                                                     | <i>Comamonas koreensis</i>                    | Betaproteobacteria                         | sMM27                                                                                            | <i>Promicromonospora sukumoe</i>      | Actinobacteria      |
| rMM19                                                                              | <i>Arthrobacter pascens</i>           | Actinobacteria      | W_5.4                                                      | <i>Flavobacterium</i> sp.                     | Bacteroidetes                              | sMM28                                                                                            | <i>Ramlibacter tataouinensis</i>      | Betaproteobacteria  |
| rMM20                                                                              | <i>Psychrobacillus psychrodurans</i>  | Firmicutes          | W_6.5b                                                     | <i>Pseudomonas</i> sp.                        | Gamma-<br>proteobacteria                   | sMM31                                                                                            | <i>Stenotrophomonas maltophilia</i>   | Gammaproteobacteria |
| rMM21                                                                              | <i>Cryocolla</i> sp.                  | Actinobacteria      | W_Sd1                                                      | <i>Glacihabitans tibetensis</i>               | Actinobacteria                             | sMM32                                                                                            | <i>Micrococcus</i> sp.                | Actinobacteria      |
| rMM23                                                                              | <i>Ochrobactrum intermedium</i>       | Alphaproteobacteria | W_Sd2                                                      | <i>Rathayibacter</i> sp.                      | Actinobacteria                             | sMM33                                                                                            | <i>Stenotrophomonas</i> sp.           | Gammaproteobacteria |
|                                                                                    |                                       |                     | W_Sd3                                                      | <i>Advenella</i> sp.                          | Betaproteobacteria                         | sMM35                                                                                            | <i>Micrococcus luteus</i>             | Actinobacteria      |
|                                                                                    |                                       |                     | W_Sd4                                                      | <i>Pseudomonas</i> sp.                        | Gamma-<br>proteobacteria                   | sMM36                                                                                            | <i>Arthrobacter</i> sp.               | Actinobacteria      |
|                                                                                    |                                       |                     | W_Sd5                                                      | <i>Rhodococcus erythropolis</i>               | Actinobacteria                             | sMM40                                                                                            | <i>Streptomyces astroliivaceus</i>    | Actinobacteria      |
|                                                                                    |                                       |                     | W_Sd8                                                      | <i>Mycoplana</i> sp.                          | Alphaproteobacteria                        | sMM41                                                                                            | <i>Sphingopyxis bauzanensis</i>       | Alphaproteobacteria |
|                                                                                    |                                       |                     | W_Sd9                                                      | <i>Enterobacter</i> sp.                       | Gamma-<br>proteobacteria                   | sMM43                                                                                            | <i>Micrococcus yunnanensis</i>        | Actinobacteria      |
|                                                                                    |                                       |                     | W_Sd11                                                     | <i>Stenotrophomonas rhizophila</i>            | Gamma-<br>proteobacteria                   | sMM44                                                                                            | <i>Streptomyces ederensis</i>         | Actinobacteria      |
|                                                                                    |                                       |                     | W_Sd13                                                     | <i>Rhodococcus</i> sp.                        | Actinobacteria                             | sMM45                                                                                            | <i>Streptomyces spororaveus</i>       | Actinobacteria      |
|                                                                                    |                                       |                     | W_B4                                                       | <i>Pedobacter daejeonensis</i>                | Bacteroidetes                              | sMM46                                                                                            | <i>Bacillus</i> sp.                   | Firmicutes          |
|                                                                                    |                                       |                     | W_B5                                                       | <i>Chryseobacterium</i> sp.                   | Bacteroidetes                              | sMM47                                                                                            | <i>Kocuria palustris</i>              | Actinobacteria      |
|                                                                                    |                                       |                     | W_B6                                                       | <i>Stenotrophomonas humi</i>                  | Gamma-<br>proteobacteria                   | sMM48                                                                                            | <i>Streptomyces atratus</i>           | Actinobacteria      |
|                                                                                    |                                       |                     | W_B10                                                      | <i>Serratia proteamaculans</i>                | Gamma-<br>proteobacteria                   | sMM49                                                                                            | <i>Micrococcus yunnanensis</i>        | Actinobacteria      |
|                                                                                    |                                       |                     |                                                            |                                               |                                            | sMM51                                                                                            | <i>Agrococcus jejunensis</i>          | Actinobacteria      |
|                                                                                    |                                       |                     |                                                            |                                               |                                            | sMMB1                                                                                            | <i>Pseudomonas</i> sp.                | Gammaproteobacteria |
|                                                                                    |                                       |                     |                                                            |                                               |                                            | sMMB2                                                                                            | <i>Serratia proteamaculans</i>        | Gammaproteobacteria |

|        |                              |                      |
|--------|------------------------------|----------------------|
| sMMB6  | <i>Enterobacter</i> sp.      | Gamma proteobacteria |
| sMMB10 | <i>Enterobacter ludwigii</i> | Gamma proteobacteria |
| sMMB14 | <i>Bacillus tequilensis</i>  | Firmicutes           |

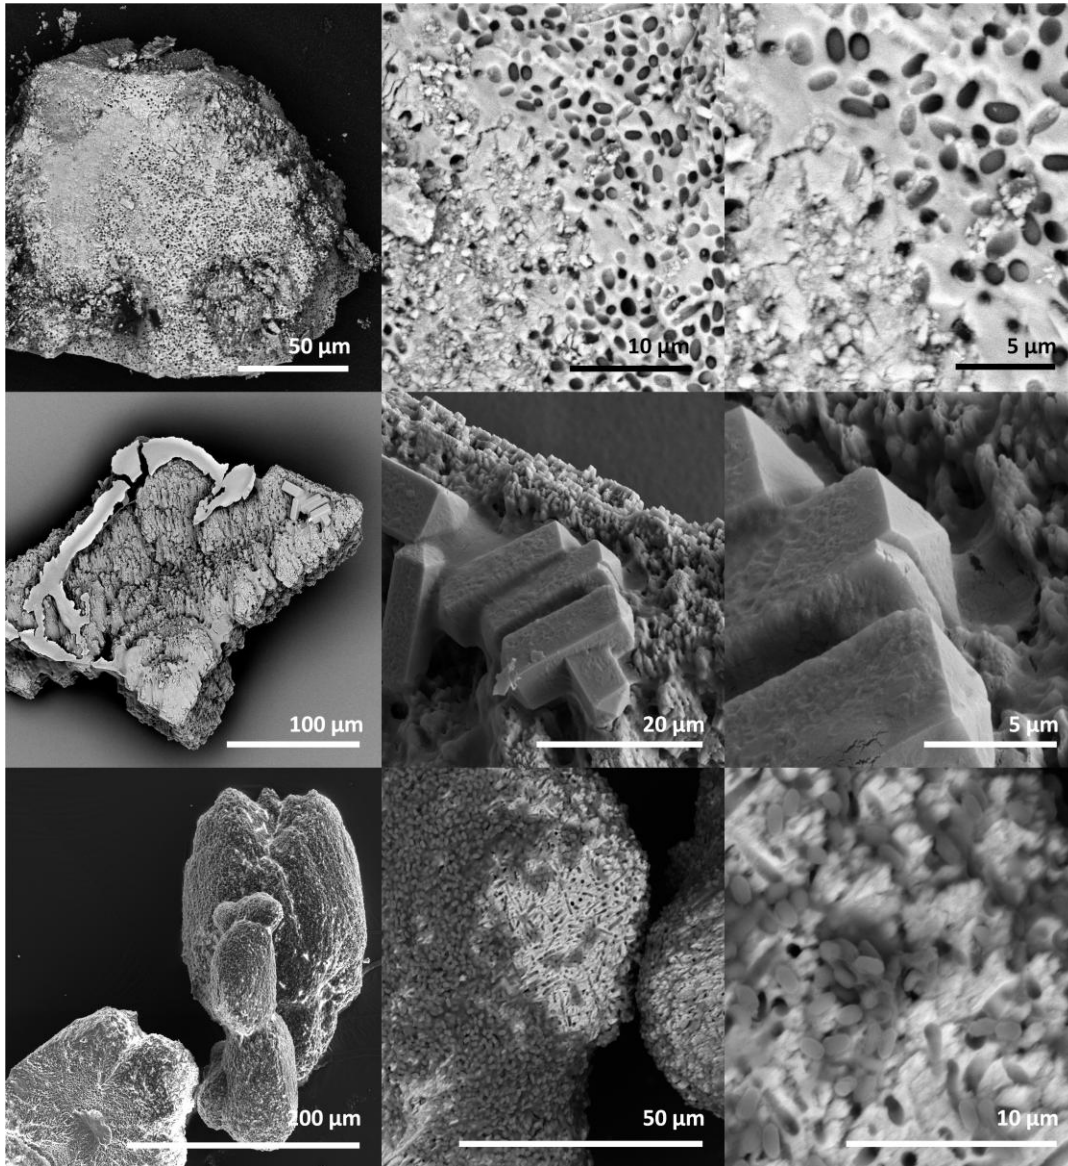

**Fig. S1:** Biominerals visualized by scanning electron microscopy. *Bacillus flexus* rLM1.5 (A), *Comamonas koreensis* W\_5.3b (B), *Bacillus* sp. rMM10 (C) are shown, each for an overview of crystal shapes, partly covered with organic matrix, and high magnification to give insight into surface and microcrystalline structures. Some minerals are settled by bacterial cells leaving holes after lysis.

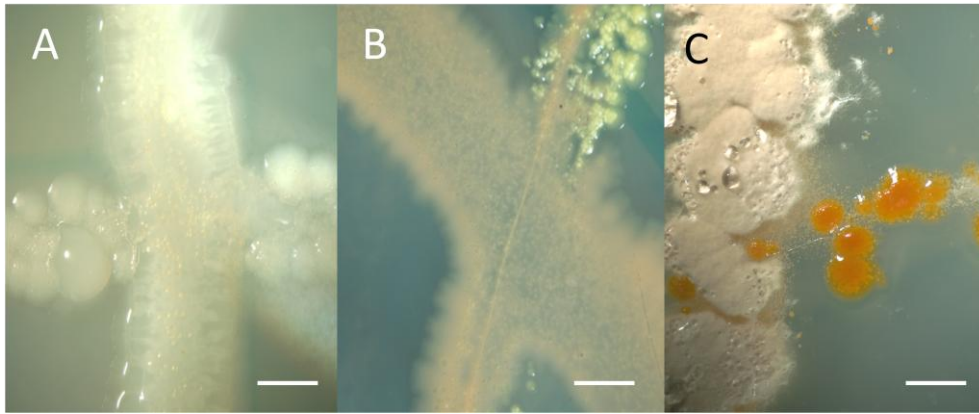

**Fig. S2:** Interactions with effects on formation of biominerals. More crystals were produced in the interaction zone between *L. amnigena* S\_H3 and *Pseudomonas* sp. (A), crystal formation was reduced at the contact zone between *Micrococcus luteus* rLMc and *Bacillus muralis* rLMd (B). *Moraxella osloensis* sMM16 vs. *Agrococcus jejunensis* sMM51 showed overgrowth (C).
